# Supplementary material for: Diversified polyoxovanadate derivatives obtained by copper(i)-catalysed azide–alkyne cycloaddition reaction: their synthesis and structural characterization
Source: Royal Society of Chemistry journal article supplement (doi:10.1039/c7dt03822d), 2017-11-27
Supplement: c7dt03822d1.pdf [file c7dt03822d1.pdf]

## Supporting materials

### **Diversified polyoxovanadate derivatives obtained by copper(I)- catalysed azide–alkyne cycloaddition reaction: Their synthesis and structural characterization**

Hongli Jia,<sup>a</sup> Qi Li,<sup>a</sup> Aruohan Bayaguud,<sup>a</sup> Yichao Huang,<sup>a</sup> Shan She,<sup>a</sup> Kun Chen,<sup>\*a</sup> and Yongge Wei<sup>\*ab</sup>

*Department of Chemistry, Tsinghua University, Beijing 100084, P. R. China*

*State Key Laboratory of Natural and Biomimetic Drugs, Peking University, Beijing, 100191, P R  
China*

#### **Table of Contents**

##### **Section 1 Experimental details**

##### **Section 1 Additional Measurements**

##### **Section 2 Additional Structural Figures**

##### **Section 3 Additional Crystallography Data**

## 1. Experimental details

**Synthesis of  $(\text{Bu}_4\text{N})_2[\text{V}_6\text{O}_{13}\{(\text{OCH}_2)_3\text{CCH}_2\text{N}_3\}_2]$ , compound 1:** Compound 1 was prepared by heating a mixture of  $(\text{Bu}_4\text{N})_2[\text{V}_6\text{O}_{13}\{(\text{OCH}_2)_3\text{CCH}_2\text{SO}_3\text{C}_7\text{H}_4\}_2] \cdot 2.5\text{CH}_3\text{CN}$  (0.314 g, 0.2 mmol) and  $\text{NaN}_3$  (0.104 g, 1.6 mmol) in 10 mL of dry DMF at 80 °C for 2 days. The reaction was monitored by IR spectroscopy and ESI-MS. After the reaction was completed, the mixture solution was cooled down to room temperature, and then, the solvent was completely evaporated out. A minimal amount of  $\text{CH}_3\text{CN}$  was added to the remaining solid to dissolve all the POM materials, and subsequently, the suspension was centrifuged. The precipitates containing excess  $\text{NaN}_3$  and the formed NaOTs were discarded. Suitable orange-red block single crystals for X-ray diffraction were grown by slow diffusion of diethyl ether into their acetonitrile solution. Compound 1 was easily crystallized in the mother liquor conveniently by addition of a small amount of acetonitrile and water. The yield was 68% based on V. Calcd: V 23.25, C 38.38, H 6.75, N 8.52, Found: V 22.97, C 38.33, H 6.72, N 8.48. IR( $\text{cm}^{-1}$ ): 3361 w, 2921 m, 2851 m, 1659 w, 1633 m, 1470 m, 1363 w, 1176 m, 1130 w, 1065 m, 952 vs, 804 s, 790 s, 717 s.  $^1\text{H}$  NMR (400 MHz,  $\text{DMSO-d}_6$ , standardized by solvent peak):  $\delta$  = 0.90 (24H, t,  $J$  = 7.2 Hz, TBA-H), 1.28 (16H, sextet, TBA-H), 1.53 (16H, quintet, TBA-H), 3.13 (16H, t,  $J$  = 8.4 Hz, TBA-H), 3.69 (s, 4H,  $\text{N}_3\text{-CH}_2\text{-C}$ ), 4.83 (s, 12H,  $\text{O-CH}_2\text{-C}$ ).  $^{13}\text{C}$  NMR (400MHz,  $\text{DMSO-d}_6$ , standardized by solvent peak):  $\delta$  = 83.62, 58.14, 52.43, 49.57, 23.73, 19.76, 14.06. ESI-MS:  $m/z$  (%): 1330.00 (10.71%)  $\{(\text{Bu}_4\text{N})[\text{V}_6\text{O}_{13}\{(\text{OCH}_2)_3\text{CCH}_2\text{N}_3\}_2]\}^-$ , 414.85 (98.89%)  $[\text{V}_6\text{O}_{13}\{(\text{OCH}_2)_3\text{CCH}_2\text{N}_3\}_2]^{2-}$ .

## 2. Additional Structural Figures

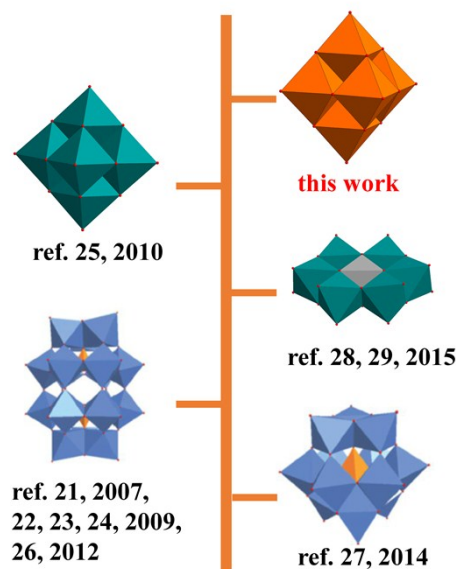

**Fig.S1.** The POMs archetype of hybrids prepared by click chemistry. Color code: light blue: W, teal: Mo, orange: V.

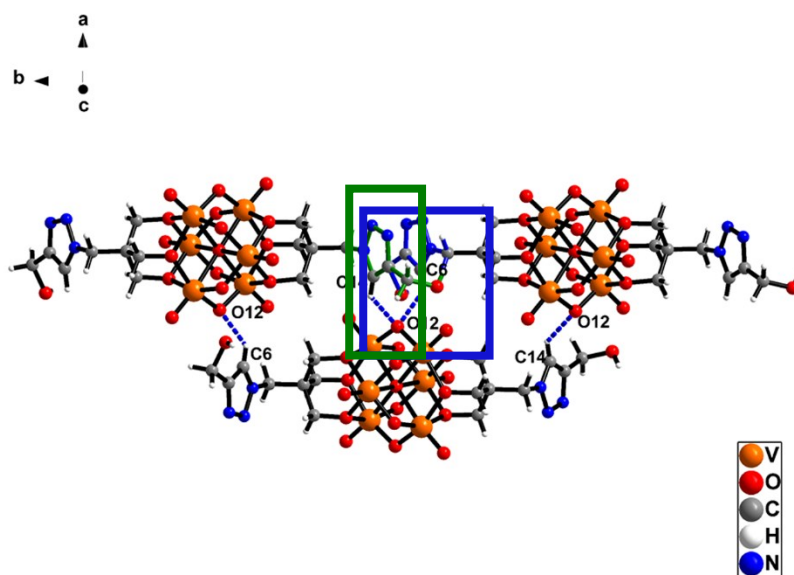

Fig.S2 The hydrogen bonds in compound 2.

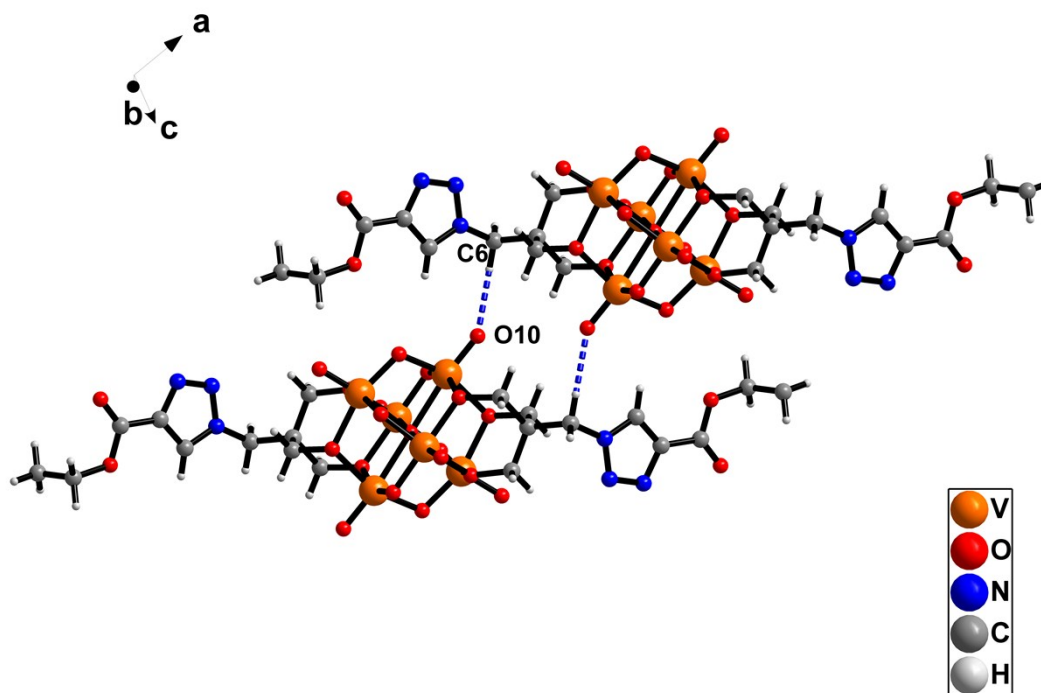

Fig. S3 The hydrogen bonds in compound 3.

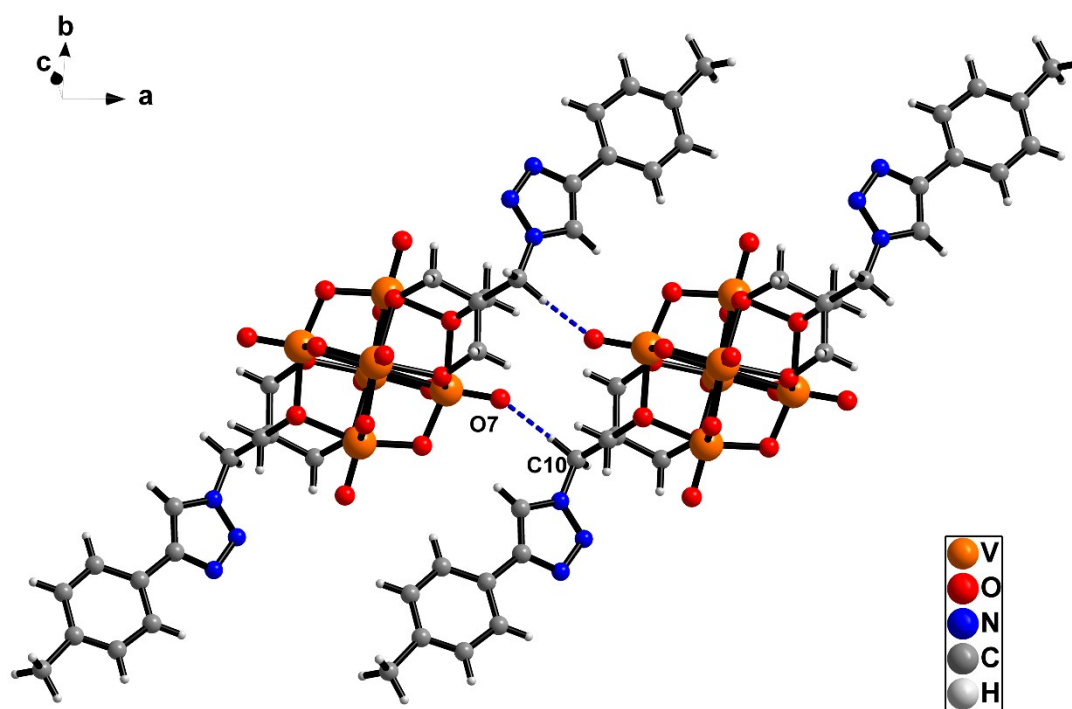

Fig. S4 The hydrogen bonds in compound 4.

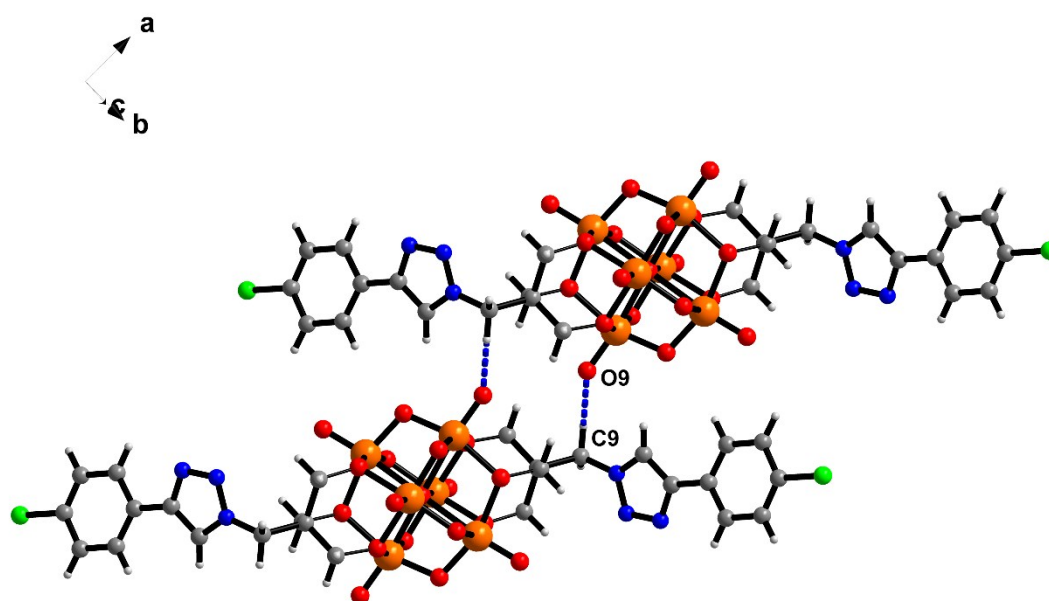

Fig. S5 The hydrogen bonds in compound 5.

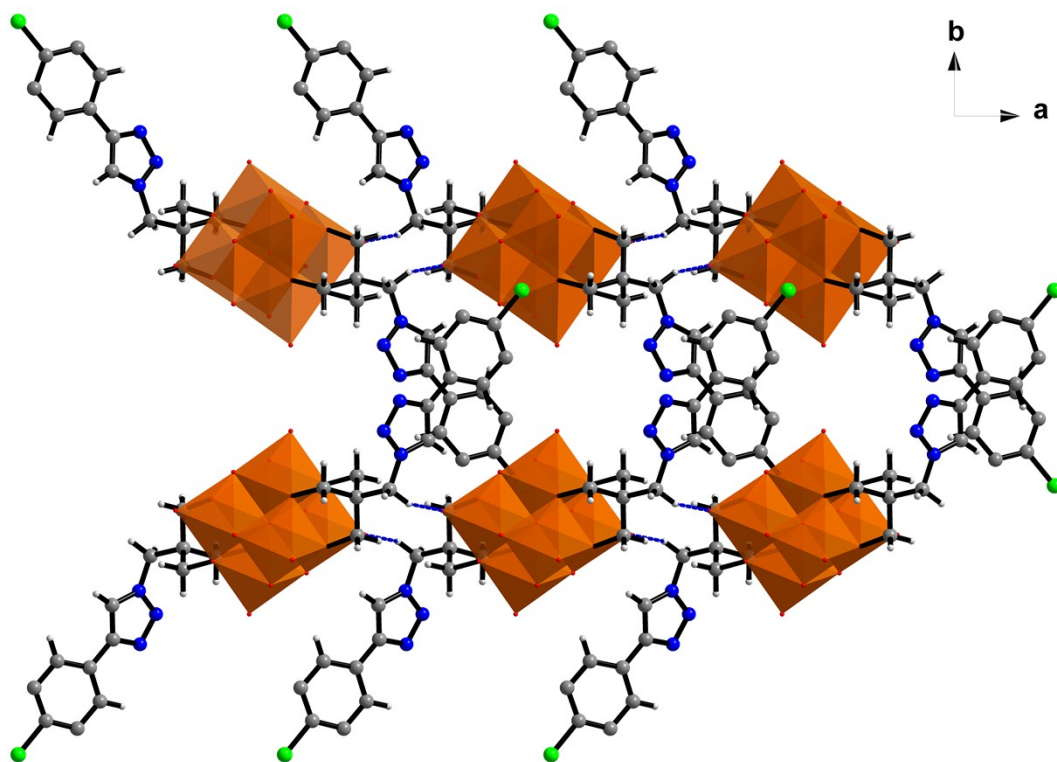

Fig. S6 The 1D chain formed through C-H...O hydrogen bonds in compound 5.

### 3. Additional Measurements

#### 3.1 IR spectra

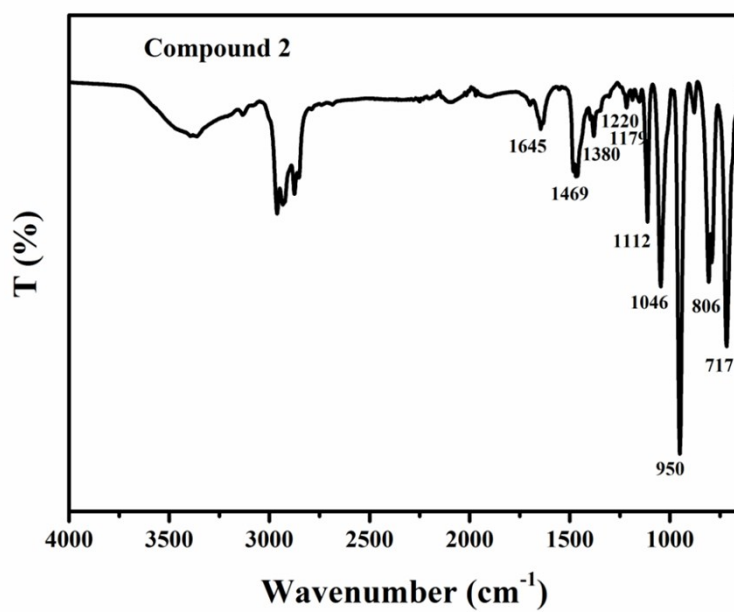

Fig. S7 IR spectrum of compound 2.

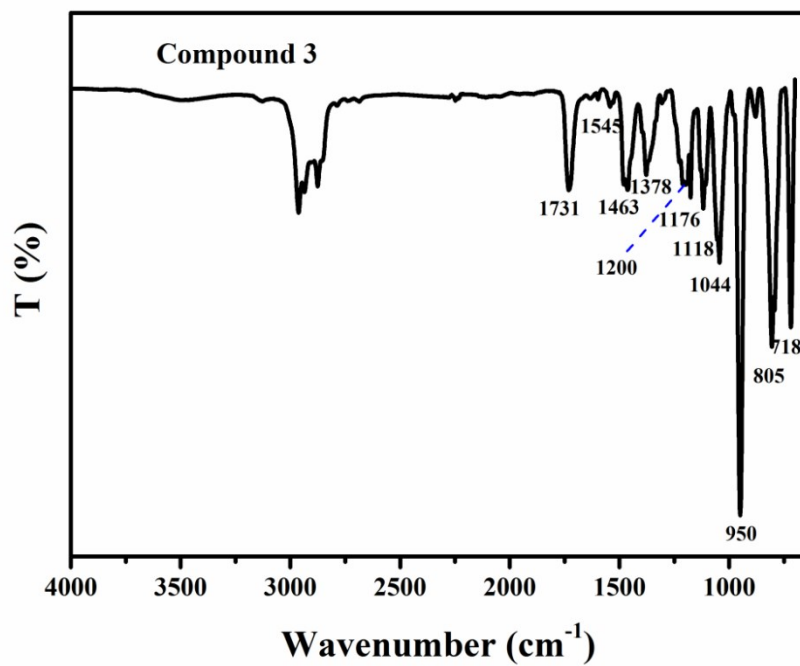

Fig. S8 IR spectrum of compound 3.

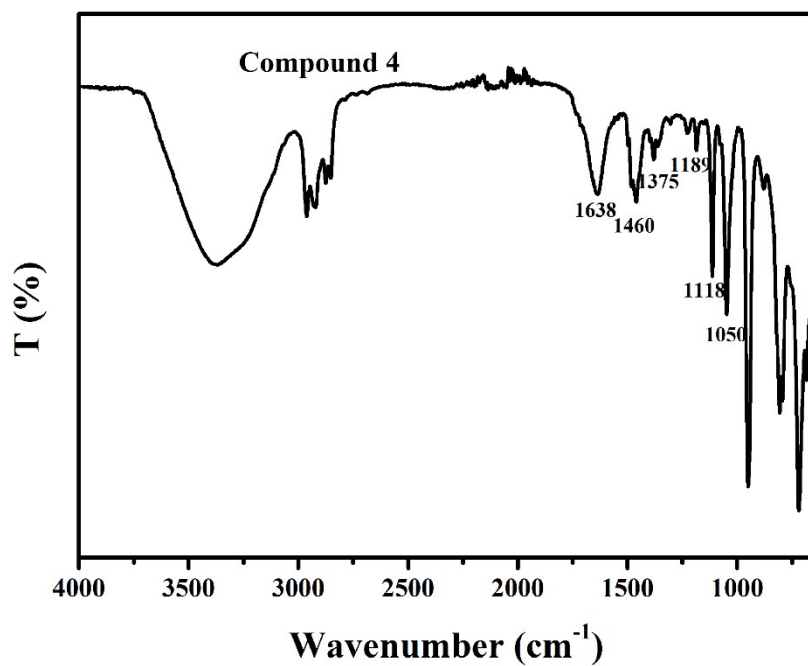

Fig. S9 IR spectrum of compound 4.

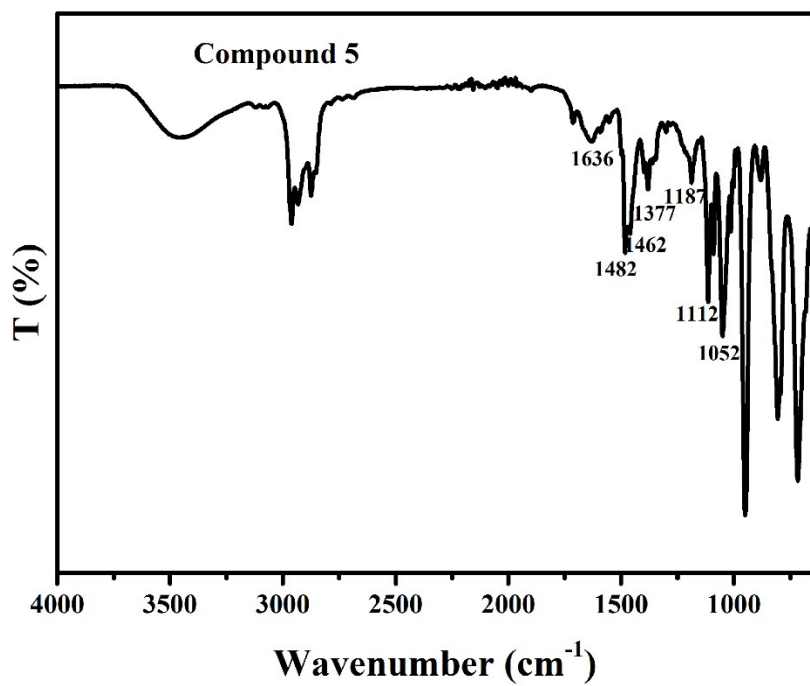

Fig. S10 IR spectrum of compound 5.

### 3.2 ESI-MS spectra

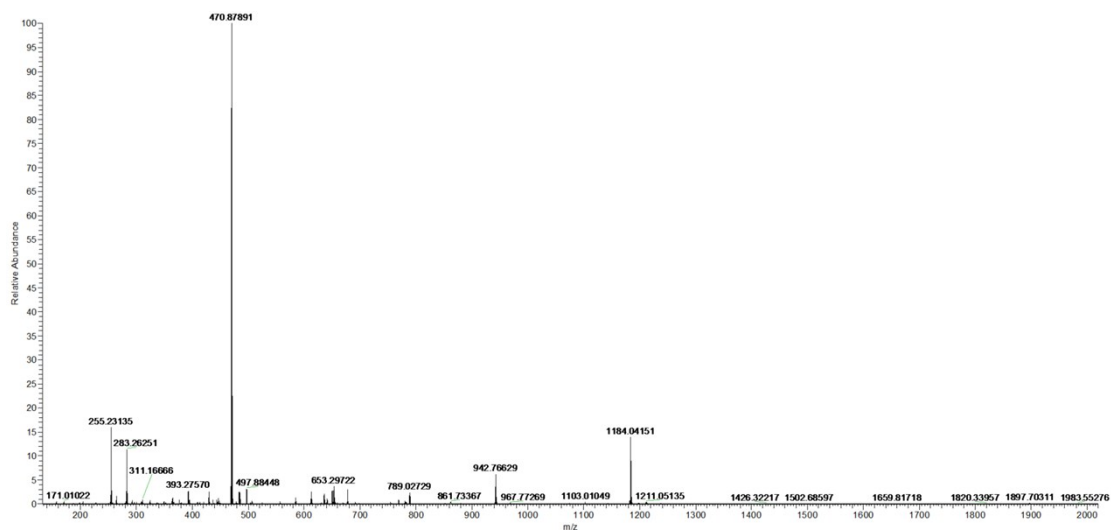

Fig. S11 ESI-MS result of compound 2.

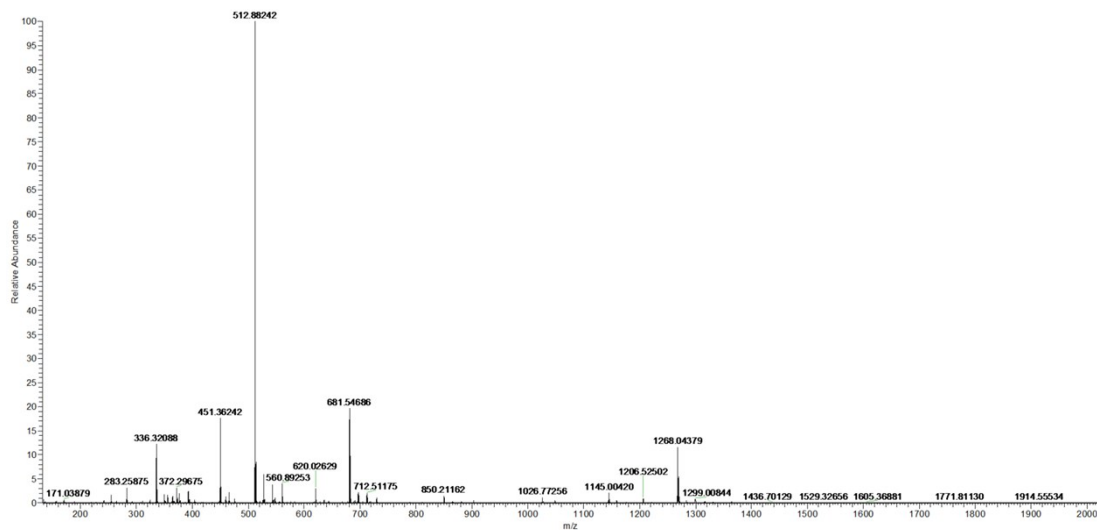

Fig. S12 ESI-MS result of compound 3.

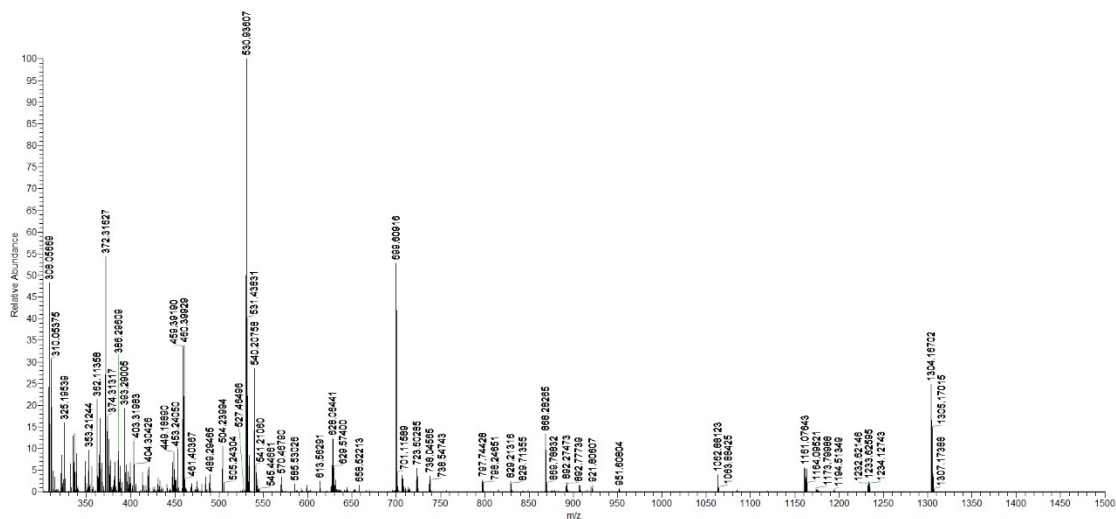

Fig. S13 ESI-MS result of compound 4.



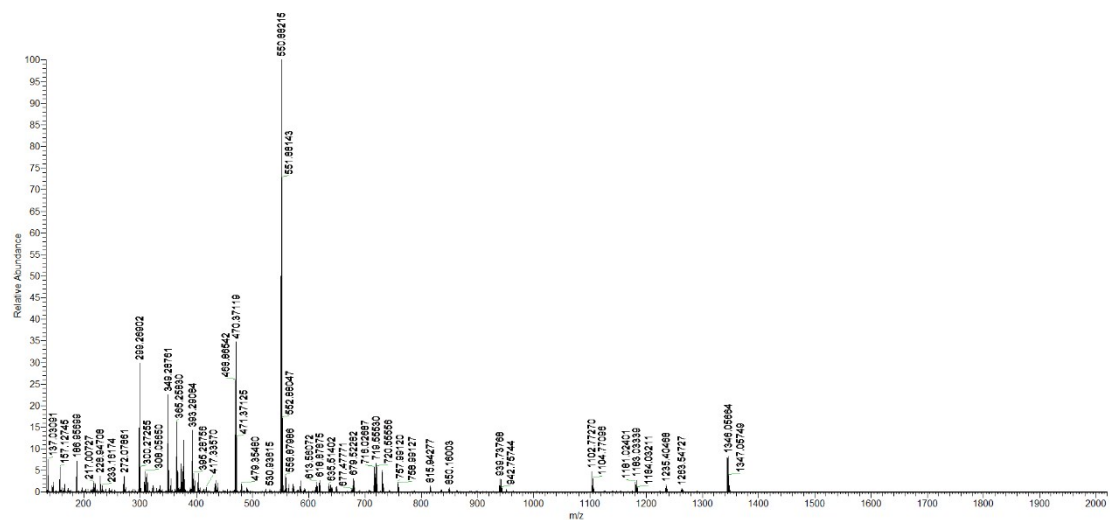

Fig. S14 ESI-MS result of compound 5.

### 3.3. XRD characterization

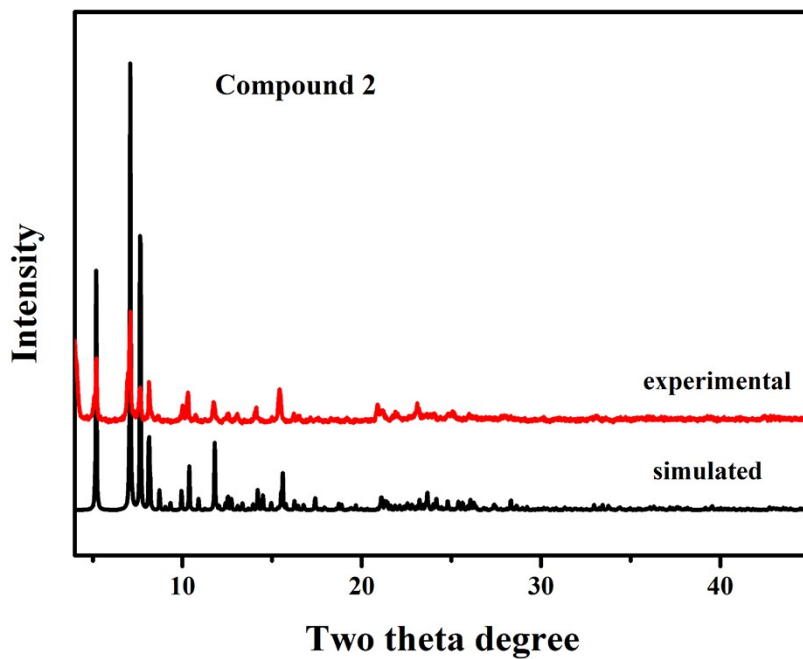

Fig. S15 The simulated (black) and experimental (red) powder XRD patterns for compound 2.

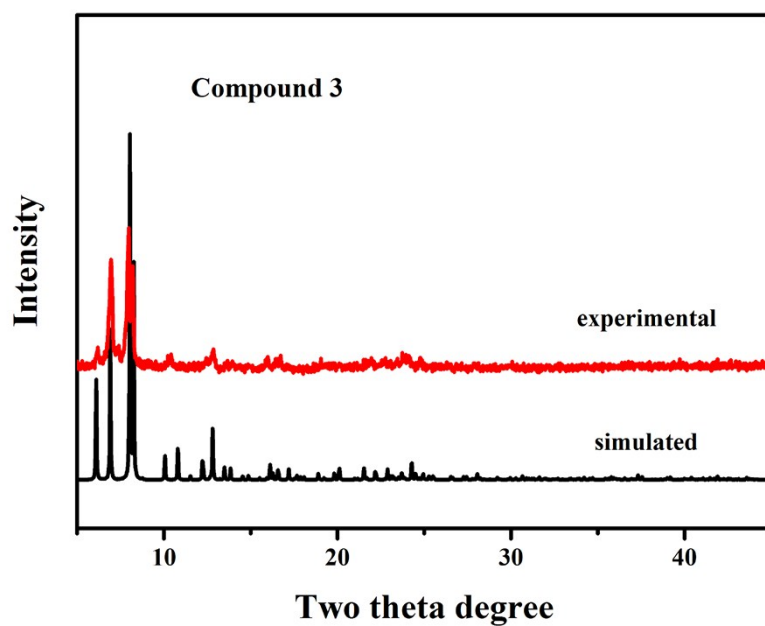

Fig. S16 The simulated (black) and experimental (red) powder XRD patterns for compound 3.

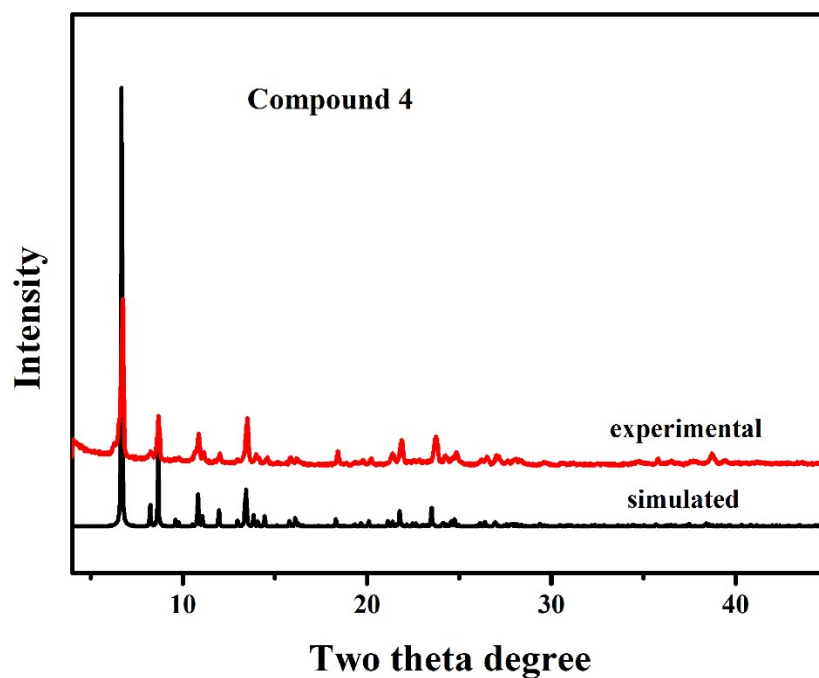

Fig.S17 The simulated (black) and experimental (red) powder XRD patterns for compound 4.

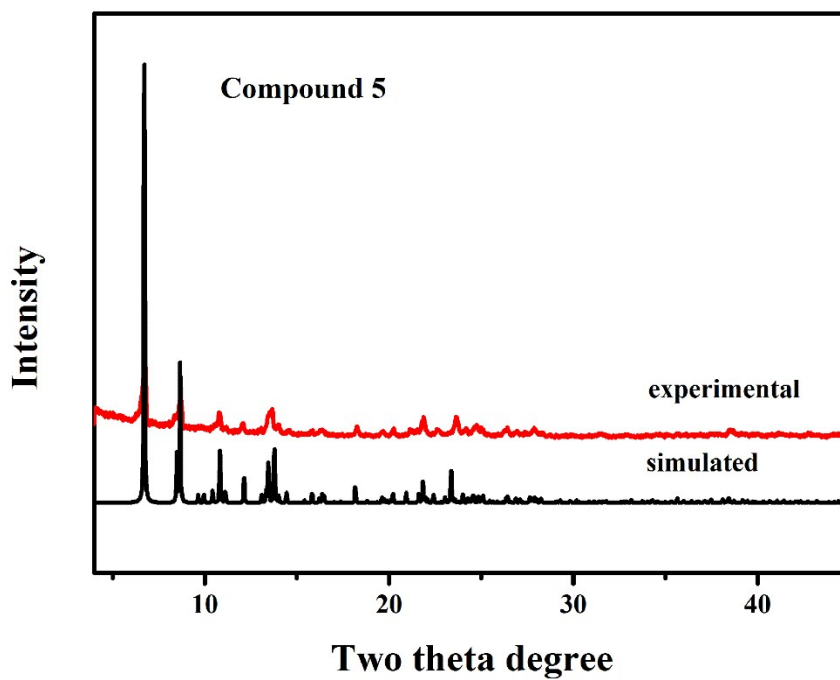

Fig.S18 The simulated (black) and experimental (red) powder XRD patterns for compound 5.

### 3.4 NMR Spectra

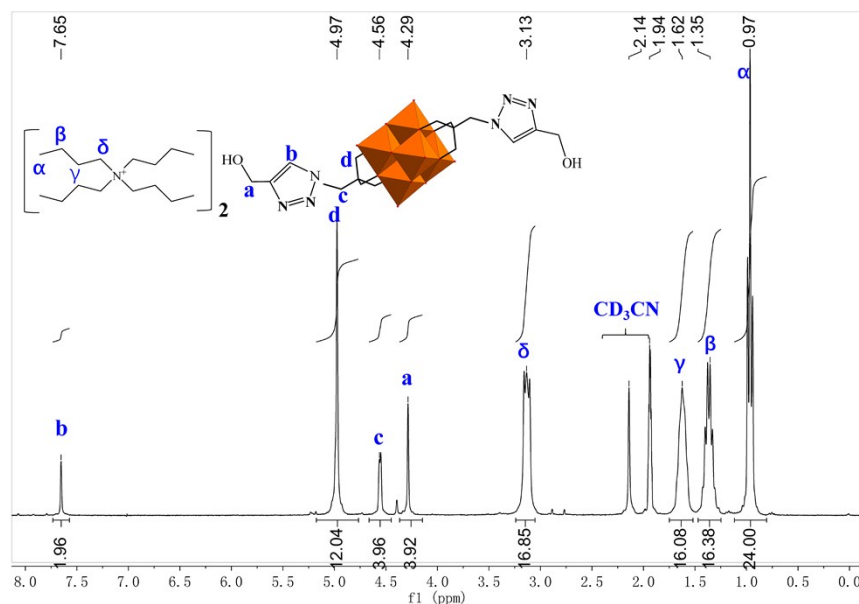

Fig.S19  $^1\text{H}$  NMR spectrum of compound 2 in  $\text{CD}_3\text{CN}$  at 400 MHz

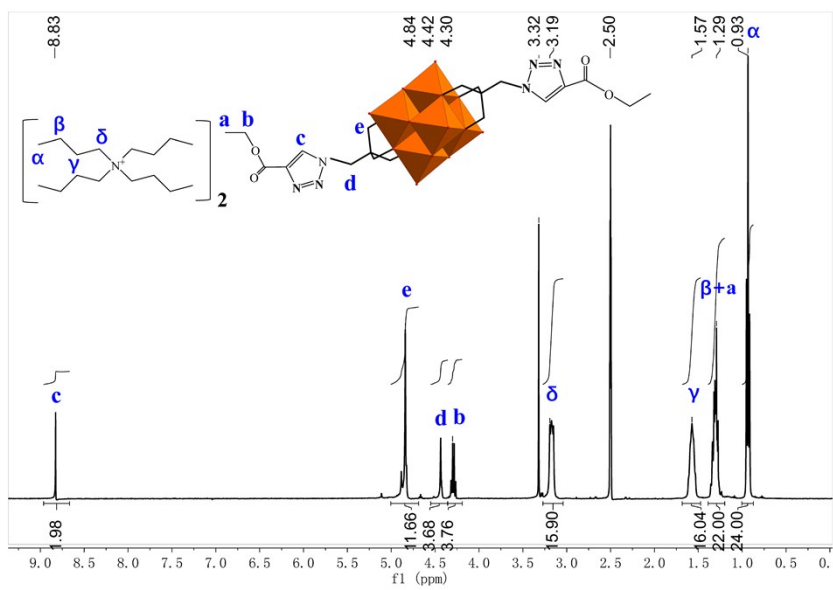

Fig.20  $^1\text{H}$  NMR spectrum of compound 3 in  $\text{DMSO-d}_6$  at 400 MHz.

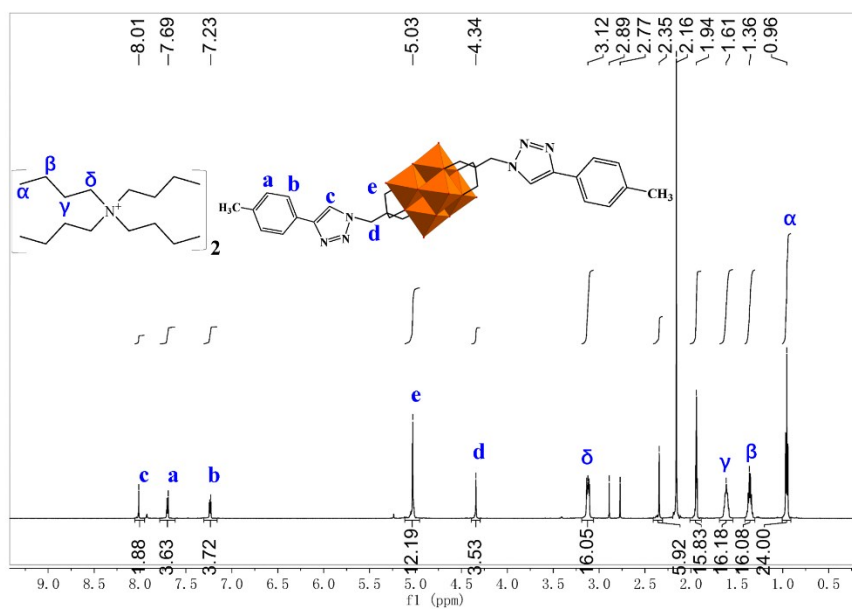

Fig.S21  $^1\text{H}$  NMR spectrum of compound 4 in  $\text{CD}_3\text{CN}$  at 400 MHz.

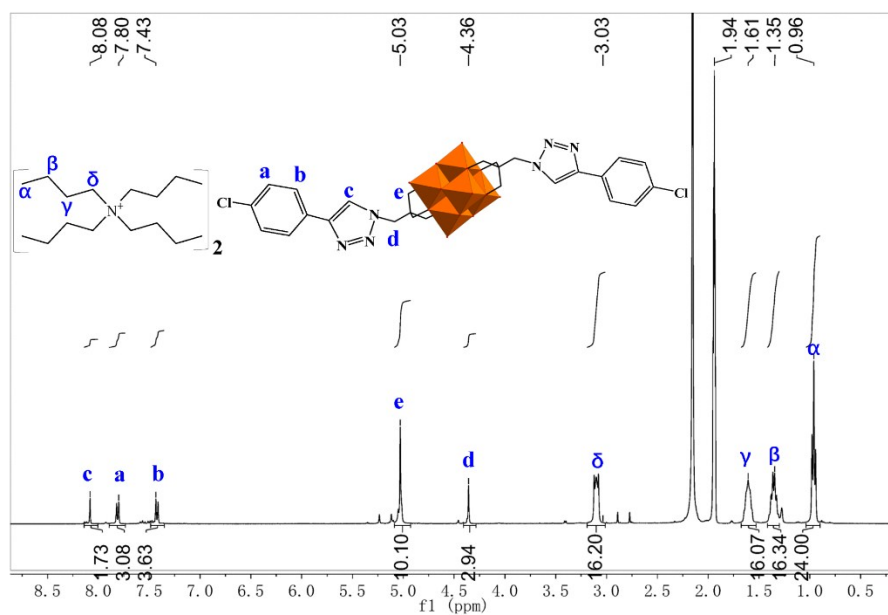

Fig.S22 <sup>1</sup>H NMR spectrum of compound 5 in CD<sub>3</sub>CN at 400 MHz.

### 3.5 UV-Vis Spectra

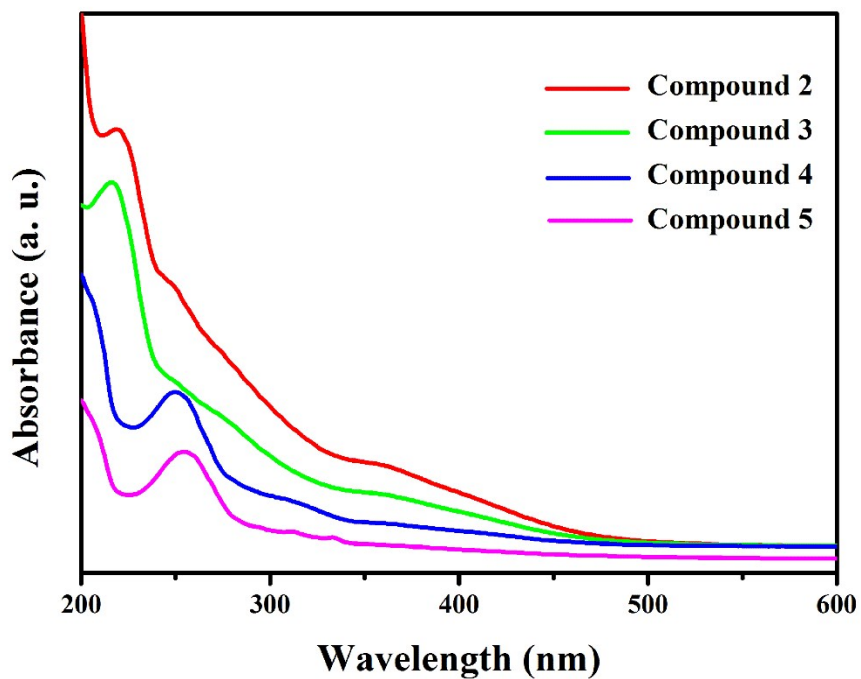

Fig. S23. UV-Vis spectra of compounds 2-5.

### 4. Additional Crystallography Data

**Table S1** Selected Bond Lengths (Å) and Angles (°) for compound **2**.

| Bond           | Lengths (Å) | Bond           | Lengths (Å) |
|----------------|-------------|----------------|-------------|
| V(1)-O(1)      | 1.598(26)   | V(5)-O(5)      | 1.6060 (29) |
| V(1)-O(11)     | 1.822(25)   | V(5)-O(9)      | 1.8086 (28) |
| V(1)-O(10)     | 1.8414 (27) | V(5)-O(12)     | 1.8525 (28) |
| V(1)-O(18)     | 2.0143 (25) | V(5)-O(17)     | 2.0095 (26) |
| V(1)-O(16)     | 2.0324 (23) | V(5)-O(18)     | 2.0230 (24) |
| V(1)-O(19)     | 2.2321 (22) | V(5)-O(19)     | 2.2459 (23) |
| V(2)-O(2)      | 1.6007 (26) | V(6)-O(6)      | 1.6039 (29) |
| V(2)-O(7)      | 1.8061 (28) | V(6)-O(8)      | 1.8072 (28) |
| V(2)-O(8)      | 1.8061 (28) | V(6)-O(9)      | 1.8586 (31) |
| V(2)-O(16)     | 1.9978 (24) | V(6)-O(15)     | 2.0014 (30) |
| V(2)-O(17)     | 2.0384 (27) | V(6)-O(15)     | 2.0372 (26) |
| V(2)-O(19)     | 2.2456 (21) | V(6)-O(1)      | 2.2389 (22) |
| V(3)-O(3)      | 1.5987 (28) | C(6)-C(7)      | 1.348 (88)  |
| V(3)-O(10)     | 1.8043 (28) | C(6)-N(1)      | 1.372 (92)  |
| V(3)-O(7)      | 1.8539 (25) | N(1)-N(2)      | 1.331 (74)  |
| V(3)-O(14)     | 2.0079 (23) | N(2)-N(3)      | 1.344(107)  |
| V(3)-O(15)     | 2.0371 (29) | C(5)-N(1)      | 1.440(66)   |
| V(3)-O(19)     | 2.2333 (23) | C(1)-C(4)      | 1.528(53)   |
| V(4)-O(4)      | 1.6094 (26) | C(1)-C(3)      | 1.532(59)   |
| V(4)-O(12)     | 1.8083 (29) | C(1)-C(2)      | 1.512(60)   |
| V(4)-O(11)     | 1.8555 (27) | C(4)-O(15)     | 1.436(42)   |
| V(4)-O(13)     | 2.0014 (27) | C(3)-O(14)     | 1.433(43)   |
| V(4)-O(14)     | 2.0233 (26) | C(2)-O(13)     | 1.438(44)   |
| V(4)-O(19)     | 2.2469 (21) |                |             |
| Bond           | Angles (°)  | Bond           | Angles (°)  |
| C(5)-N(2)-N(1) | 120.67 (41) | C(1)-C(5)-N(1) | 115.31 (35) |
| C(5)-N(1)-C(6) | 127.29 (42) |                |             |

**Table S2** Selected Bond Lengths (Å) and Angles (°) for compound **3**.

| Bond       | Lengths (Å) | Bond       | Lengths (Å) |
|------------|-------------|------------|-------------|
| V(1)-O(12) | 1.609 (23)  | V(3)-O(11) | 2.025 (22)  |
| V(1)-O(11) | 2.005(22)   | V(3)-O(6)  | 2.237 (5)   |
| V(1)-O(5)  | 2.029(23)   | C(6)-N(3)  | 1.437(53)   |
| V(1)-O(6)  | 2.234(5)    | C(5)-N(3)  | 1.346(56)   |
| V(2)-O(3)  | 1.606(25)   | C(4)-C(5)  | 1.376(60)   |
| V(2)-O(4)  | 1.845(24)   | C(4)-N(1)  | 1.371(60)   |
| V(2)-O(5)  | 2.004(22)   | N(1)-N(2)  | 1.310(64)   |
| V(2)-O(7)  | 2.037 (22)  | N(2)-N(3)  | 1.349(50)   |
| V(2)-O(6)  | 2.246 (5)   | C(3)-C(4)  | 1.477(70)   |

|                |             |                |             |
|----------------|-------------|----------------|-------------|
| V(3)-O(10)     | 1.602 (23)  | C(3)-O(2)      | 1.183(60)   |
| V(3)-O(8)      | 1.801 (24)  | C(3)-O(1)      | 1.327(59)   |
| V(3)-O(9)      | 1.839 (24)  | C(2)-O(1)      | 1.460(71)   |
| V(3)-O(7)      | 2.007 (22)  | C(1)-C(2)      | 1.409(90)   |
| Bond           | Angles (°)  | Bond           | Angles (°)  |
| C(3)-C(4)-C(5) | 128.86 (41) | N(2)-N(3)-C(6) | 121.96 (36) |
| C(3)-C(4)-N(1) | 123.12 (40) | N(2)-N(3)-C(5) | 110.70 (37) |
| C(1)-C(2)-O(1) | 111.61 (52) | C(4)-C(5)-N(3) | 104.93 (37) |
| C(5)-N(3)-C(6) | 127.29 (34) | C(8)-C(6)-N(3) | 116.29 (32) |

**Table S3** Selected Bond Lengths (Å) and Angles (°) for compound **4**.

| Bond             | Lengths (Å) | Bond           | Lengths (Å)  |
|------------------|-------------|----------------|--------------|
| V(1)-O(5)        | 1.6008 (40) | C(1)-C(2)      | 1.5059 (124) |
| V(1)-O(7)        | 1.8099 (39) | C(2)-C(3)      | 1.3411 (146) |
| V(1)-O(8)        | 1.8470 (31) | C(2)-C(7)      | 1.3694 (141) |
| V(1)-O(4)        | 2.0140 (28) | C(3)-C(4)      | 1.4328 (132) |
| V(1)-O(2)        | 2.0297 (37) | C(4)-C(5)      | 1.3836 (111) |
| V(1)-O(6)        | 2.2458 (9)  | C(5)-C(6)      | 1.3829 (92)  |
| V(2)-O(10)       | 1.6012 (30) | C(6)-C(7)      | 1.3813 (105) |
| V(2)-O(8)        | 1.8106 (38) | C(5)-C(8)      | 1.4692 (92)  |
| V(2)-O(9)        | 1.8285 (39) | C(8)-C(9)      | 1.3554 (86)  |
| V(2)-O(1)        | 2.0071 (35) | C(8)-N(1)      | 1.3604 (75)  |
| V(2)-O(4)        | 2.0233 (34) | N(1)-N(2)      | 1.3115 (87)  |
| V(2)-O(6)        | 2.2256 (6)  | N(2)-N(3)      | 1.3173 (70)  |
| V(3)-O(3)        | 1.6095 (39) | N(3)-C(10)     | 1.4259 (83)  |
| V(3)-O(9)        | 1.8109 (33) | N(3)-C(9)      | 1.3646 (72)  |
| V(3)-O(7)        | 1.8420 (41) | C(10)-C(12)    | 1.5589 (64)  |
| V(3)-O(2)        | 2.0109 (38) |                |              |
| V(3)-O(1)        | 2.0252 (29) |                |              |
| V(3)-O(6)        | 2.2417 (8)  |                |              |
| Bond             | Angles (°)  | Bond           | Angles (°)   |
| C(3)-C(2)-C(7)   | 118.66 (88) | C(9)-N(3)-N(2) | 110.38 (54)  |
| C(3)-C(4)-C(5)   | 118.86 (86) | N(1)-N(2)-N(3) | 107.77 (48)  |
| C(4)-C(5)-C(6)   | 118.43 (73) | N(2)-N(1)-C(8) | 109.08 (54)  |
| C(8)-C(9)-N(3)   | 105.05 (49) | N(8)-C(9)-N(1) | 107.71 (57)  |
| N(3)-C(10)-C(12) | 115.00 (50) |                |              |

**Table S4** Selected Bond Lengths (Å) and Angles (°) for compound **5**.

| Bond       | Lengths (Å) | Bond       | Lengths (Å)  |
|------------|-------------|------------|--------------|
| V(1)-O(9)  | 1.5959 (28) | C(1)-Cl(1) | 1.7533 (73)  |
| V(1)-O(10) | 1.8060 (35) | C(1)-C(2)  | 1.3288 (112) |
| V(1)-O(8)  | 1.8272 (35) | C(1)-C(6)  | 1.3596 (114) |
| V(1)-O(1)  | 1.9994 (32) | C(2)-C(3)  | 1.4171 (103) |

|                  |             |                 |               |
|------------------|-------------|-----------------|---------------|
| V(1)-O(3)        | 2.0180 (31) | C(3)-C(4)       | 1.3766 (90)   |
| V(1)-O(7)        | 2.2236 (6)  | C(4)-C(5)       | 1.3681 (75)   |
| V(2)-O(6)        | 1.5915 (39) | C(5)-C(6)       | 1.3947 (89)   |
| V(2)-O(8)        | 1.8111 (30) | C(7)-C(4)       | 1.4623 (83)   |
| V(2)-O(5)        | 1.8454 (37) | C(7)-C(8)       | 1.3672 (80)   |
| V(2)-O(2)        | 2.0087 (33) | C(7)-N(1)       | 1.3562 (66)   |
| V(2)-O(1)        | 2.0271 (26) | N(1)-N(2)       | 1.3349 (77)   |
| V(2)-O(7)        | 2.2441 (8)  | N(2)-N(3)       | 1.3259 (62)   |
| V(3)-O(4)        | 1.5991 (36) | N(3)-C(9)       | 1.4254 (71)   |
| V(3)-O(5)        | 1.7980 (37) | N(3)-C(8)       | 1.3442 (64)   |
| V(3)-O(10)       | 1.8552 (28) | C(9)-C(10)      | 1.5561 (63)   |
| V(3)-O(3)        | 2.0169 (25) |                 |               |
| V(3)-O(2)        | 2.0328 (33) |                 |               |
| V(3)-O(7)        | 2.2480 (8)  |                 |               |
| Bond             | Angles (°)  | Bond            | Angles (°)    |
| C(3)-C(2)-C(7)   | 118.66 (88) | C(9)-N(3)-N(2)  | 110.38 (54)   |
| C(3)-C(4)-C(5)   | 118.86 (86) | N(1)-N(2)-N(3)  | 107.77 (48)   |
| C(4)-C(5)-C(6)   | 118.43 (73) | N(2)-N(1)-C(8)  | 109.08 (54)   |
| C(8)-C(9)- N(3)  | 105.05 (49) | N(8)-C(9)- N(1) | 107.71 (0.57) |
| N(3)-C(10)-C(12) | 115.00 (50) |                 |               |

### Selected Torsion Angle (°)

**Table S5:** Selected Torsion Angle (°) for compounds **3**.

| <b>Compound 3</b> |             |                   |            |
|-------------------|-------------|-------------------|------------|
| C3 - O1 - C2 - C1 | 85.92 ( 69) | N3 - N2 - N1 - C4 | -1.26 (52) |

**Table S6.** Hydrogen bond distances and angles of compound **2-5** [ $\text{\AA}$  and  $^\circ$ ].

| D-H...A           | d(D-H) | d(H...A) | d(D...A) | $\angle(\text{DHA})$ |
|-------------------|--------|----------|----------|----------------------|
| <b>Compound 2</b> |        |          |          |                      |
| C6-H6...O12       | 0.93   | 2.35     | 3.045    | 130.44               |
| C14-H14...O12     | 0.93   | 2.42     | 3.078    | 127.91               |
| <b>Compound 3</b> |        |          |          |                      |
| C6-H6B...O10      | 0.97   | 2.32     | 3.199    | 149.83               |
| <b>Compound 4</b> |        |          |          |                      |
| C10-H10B...O7     | 0.970  | 2.339    | 3.145    | 140.05               |
| <b>Compound 5</b> |        |          |          |                      |
| C9-H9A...O9       | 0.970  | 2.378    | 3.165    | 137.91               |
